## RESEARCH ARTICLE

# Pooled prevalence and risk factors of malaria among children aged 6–59 months in 13 sub-Saharan African countries: A multilevel analysis using recent malaria indicator surveys

Dagmawi Chilot<sup>1\*</sup>, Annelies Mondelaers<sup>2</sup>, Adugnaw Zeleke Alem<sup>3</sup>, Mezgebu Selamsew Asres<sup>4</sup>, Mulugeta Ayalew Yimer<sup>5</sup>, Alemayehu Teklu Toni<sup>5</sup>, Tadesse Awoke Ayele<sup>3</sup>

**1** Department of Human Physiology, University of Gondar, College of Medicine and Health Science, School of Medicine, Gondar, Ethiopia, **2** Department of Clinical Sciences, Institute of Tropical Medicine, Antwerp, Belgium, **3** Department of Epidemiology & Biostatistics, Institute of Public Health, University of Gondar, College of Medicine and Health Science, Gondar, Ethiopia, **4** Department of Internal Medicine, College of Medicine and Health Sciences, University of Gondar, Gondar, Ethiopia, **5** Department of Pediatrics and Child Health, College of Medicine and Health Sciences, University of Gondar, Gondar, Ethiopia

\* [dagimchilot21@gmail.com](mailto:dagimchilot21@gmail.com)

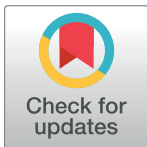

## OPEN ACCESS

**Citation:** Chilot D, Mondelaers A, Alem AZ, Asres MS, Yimer MA, Toni AT, et al. (2023) Pooled prevalence and risk factors of malaria among children aged 6–59 months in 13 sub-Saharan African countries: A multilevel analysis using recent malaria indicator surveys. PLoS ONE 18(5): e0285265. <https://doi.org/10.1371/journal.pone.0285265>

**Editor:** Musa Mohammed Ali, Hawassa University College of Medicine and Health Sciences, ETHIOPIA

**Received:** November 27, 2022

**Accepted:** April 19, 2023

**Published:** May 31, 2023

**Copyright:** © 2023 Chilot et al. This is an open access article distributed under the terms of the [Creative Commons Attribution License](https://creativecommons.org/licenses/by/4.0/), which permits unrestricted use, distribution, and reproduction in any medium, provided the original author and source are credited.

**Data Availability Statement:** Data are available online in a public, open-access repository ([www.measuredhs.com/data](http://www.measuredhs.com/data)).

**Funding:** The funders had no role in study design, data collection and analysis, decision to publish, or preparation of the manuscript.

**Competing interests:** The authors have declared that no competing interests exist.

## Abstract

### Background

Every 75 seconds, a child under five dies of malaria. Mainly children, aged between six months and five years, are at the highest risk for malaria. These children lost maternal immunity and did not yet developed specific immunity to the infection. Under the age of five, children bear the highest burden of malaria in Sub-Saharan Africa (SSA). Many individual and community level factors could contribute to malaria prevalence remaining high among under-five children in the region. Thus, this study aimed to assess the pooled prevalence of malaria among children aged 6–59 months and identify potential factors associated with malaria by using recent Malaria Indicator Surveys in 13 SSA countries.

### Methods

Data for this study were drawn from recent 13 Sub-Saharan African countries Malaria Indicator Surveys (MIS). A total weighted sample of 60,541 children aged 6–59 months was included. STATA version 14.2 was used to clean, code and analyze the data. Multilevel logistic regression was employed to identify factors associated with malaria. Adjusted odds ratio with 95% CI and a P value <0.05 was reported to indicate statistical association. Model fitness and comparison were done using Inter cluster correlation coefficient, Median odds ratio, proportional change in variance, and deviance.

**Abbreviations:** AOR, Adjusted Odds Ratio; DHSs, Demographic and Health Surveys; ICC, Intra cluster correlation coefficient; MIS, Malaria Indicator Survey; MOR, median odds ratio; PCV, a proportional change in variance; SSA, Sub-Saharan Africa; WHO, World Health Organization.

## Results

The pooled prevalence of malaria among children aged 6–59 months was found to be 27.41% (95% CI: 17.94%–36.88%). It ranges from 5.04% in Senegal to 62.57% in Sierra Leone. Aged 36–47 months (AOR = 3.54, 95% CI 3.21–3.91), and 48–59 months (AOR = 4.32, 95% CI 3.91–4.77), mothers attended primary education (AOR = 0.78, 95% CI 0.73–0.84), richer (AOR = 0.35, 95% CI 0.32–0.39), and richest household (AOR = 0.16, 95% CI 0.14–0.19), number of three and more under-five children (AOR = 1.35, 95% CI 1.26–1.45), improved floor material (AOR = 0.65, 95% CI 0.57–0.73), improved wall material (AOR = 0.73, 95% CI 0.64–0.84), improved roof material (AOR = 0.70, 95% CI 0.51–0.93), insecticide-treated bed net (ITN) use (0.56, 95% CI 0.51–0.62), not anemic (AOR = 0.05, 95% CI 0.04–0.06), rural resident (AOR = 2.16, 95% CI 2.06–2.27), high community ITN use (AOR = 0.40, 95% CI 0.24–0.63) and high community poverty (AOR = 2.66, 95% CI 2.53–2.84) were strongly associated with malaria.

## Conclusions and recommendations

Almost 3 out of 10 children were infected by malaria in 13 SSA countries. Malaria infection remains one of the main killers of children aged 6–59 months in the SSA. This study revealed that older under-five children living in large families with low incomes in rural areas are most vulnerable to malaria infection. Our results clearly indicate that ITN utilization and improved housing are promising means to effectively prevent malaria infection among children aged 6–59 months. It is therefore important to note that households with low wealth quintiles and rural residents should be prioritized in any mass distribution of ITNs. This has to be accompanied by education using mass media to enhance community awareness.

## Background

Although malaria is a preventable and curable disease, it remains a major public health problem, particularly in low and middle-income countries [1–3]. In 2020, nearly half of the world's population was at risk of malaria. About 241 million people were infected and over 627 000 died, indicating 14 million more cases and 69 000 more deaths in 2020 compared to 2019 [4,5]. The African region, which carries a disproportionately high share of the global malaria burden, accounted for 95% of malaria cases and 96% of malaria deaths in the same year [6]. The risk was even considerably higher among infants, under-five children, pregnant women, and patients with HIV/AIDS [7–10]. In 2020, under-five children accounted for about 80% of all malaria deaths in the World Health Organization (WHO) African region [6].

The control and eradication of malaria demand a multifaceted approach [11]. Since the early 20<sup>th</sup> century, the world has put effort into organizing different programs and campaigns to control and eradicate malaria and save millions of lives. These include the Malaria Commission of the League of Nations (1920), the global eradication campaigns (1950), the Ministerial Conference on Malaria (1992), the Roll Back Malaria (RBM) movement (1998), the Global Fund (2015), Millennium Development Goals (MDGs) and Sustainable Development Goals (SDGs) [12–15]. Despite substantial progress has been made over the past decades, the prevalence is unacceptably high, especially in some African countries [16,17]. In 2020, four Sub-Saharan African (SSA) nations, including Nigeria (31.9%), Dr. Congo (13.2%), Tanzania (4.1%), and Mozambique (3.8%), accounted for over half (53%) of all malaria deaths worldwide [6].

Every 75 seconds, a child under five dies of malaria [18]. Mainly, children aged between six months and five years are at the highest risk for malaria because during this period they have lost maternal immunity and did not yet developed specific immunity to the infection [19,20]. Under-five children bear the highest burden of malaria in SSA [21,22]. Many countries in the region have missed the MDGs and are lagging far behind the SDGs' targets of reducing malaria case incidence and mortality rates by at least 90% by 2030 [23,24]. Although there are many factors responsible for this, poverty takes the lion's share [25]. Malaria is commonly recognized as a disease of poverty which explains why its incidence is concentrated in the world's poorest countries [26–28]. In addition to poverty, previous studies have shown that place of residence, insecticide-treated bed net (ITN) utilization, housing conditions (floor, wall, and roof materials), children's anemia level, women's education, and media access have the highest impact on malaria burden among those under-five children [29–33].

Despite malaria among under-five children being well recognized as a common public health problem, its prevalence and different determinants have been less investigated in SSA. The persistent and overwhelming burden of deaths among under-five children indicates the urgent need for collective action against malaria. Adequate understanding of the socio-economic, environmental, and cultural factors is important to successfully prevent the burden. Besides if the SDG-3 targets are to be met, coordinated action is required toward not only sustaining current rates of decline but also accelerating progress. Therefore, the objective of this study was to assess the prevalence of malaria among children aged 6–59 months and the potential factors associated with the malaria risk in 13 SSA countries. Our study provided evidence-based recommendations to control and eliminate malaria in those children on a large scale in SSA.

## Materials and methods

### Study design, setting, and period

This study was conducted on a secondary data from the recent Malaria Indicator Surveys (MIS) of 13 SSA countries. These countries are Burkina Faso, Ghana, Guinea, Kenya, Liberia, Madagascar, Mali, Malawi, Mozambique, Nigeria, Sierra Leone, Senegal, and Tanzania (Table 1).

### Sources of data and sampling procedure

This study used the most recent MIS data from 13 SSA countries conducted from 2015 to 2021. MIS is a cross-sectional nationally representative survey undertaken across Low- and Middle-Income Countries (LMICs), developed by the Monitoring and Evaluation Working Group (MERG) of RBM. MIS collects national and regional or provincial data from a representative sample of respondents. It measures key indicators that are considered important

**Table 1. Country's malaria indicator year of survey.**

| Country      | Year of survey | Country      | Year of survey |
|--------------|----------------|--------------|----------------|
| Burkina Faso | 2017/18        | Malawi       | 2017           |
| Ghana        | 2019           | Mozambique   | 2018           |
| Guinea       | 2021           | Nigeria      | 2015           |
| Kenya        | 2020           | Sierra Leone | 2016           |
| Liberia      | 2016           | Senegal      | 2020/21        |
| Madagascar   | 2016           | Tanzania     | 2017           |
| Mali         | 2021           |              |                |

<https://doi.org/10.1371/journal.pone.0285265.t001>

which enables countries to generate data useful to inform policy makers and improve malaria control programs. All MIS use the same standardized data collection procedures, sampling, questionnaires, and coding, making the results comparable across countries.

To assure national representativeness, the survey was based on a two-stage sampling technique. In the first stage, the selection of proportional clusters/enumeration areas was performed using each country's most recent population and housing census as a sampling frame. In the second stage, households were sampled using systematic random sampling from the newly created household listing selection of census enumeration areas. A detailed description of the MIS sampling design and data collection procedures can be found in each country's DHS report. A total of 74,976 parents/guardians were interviewed in 13 SSA countries. For this study, a total of 64,247 children aged 6–59 months, who had slept last night and households selected for hemoglobin were included. We weighted the sample using the individual weight of women (hv005) to produce the proper representation. Hence, sample weights were generated by dividing (hv005) by 1,000,000 and the total weighted sample of 60,541 children was used for the analysis.

## Variables of the study

**Outcome variable.** The outcome variable was malaria infection detected by a rapid diagnostic test or microscopy among children aged 6–59 months.

**Independent variables.** Based on previous literature, theoretical and practical significance, the independent variables for this study were the age of the child, sex of the child, mother's educational level, age of household head, wealth index, number of under-five children, the household has radio, the household has television, the household has electricity, source of drinking water, type of toilet facility, main floor material, main wall material, main roof material, type of bed net, number of mosquito net, anemia level, residence, community ITN usage, community poverty, community media usage, and community-women education ([Table 2](#)).

## Data processing and analyses

Thirteen SSA countries datasets were appended together to explore the pooled prevalence of malaria and its associated factors among children aged 6–59 months. STATA version 14.2 was used for data cleaning, coding, and statistical analysis. Frequencies and percentages were used to describe the background characteristics of the study participants. To identify associated factors of malaria we used the multilevel logistic regression since MIS data are hierarchical in nature. Four models were fitted which comprised the null model (model 0) without any explanatory variables, Model I with individual-level variables only, Model II with community-level factors only, and Model III with both individual-level and community-level variables.

The Intra-class Correlation Coefficient (ICC), and the Median Odds Ratio (MOR) were computed to assess the clustering effect/variability. The ICC was calculated for each of the models using the formula,  $ICC = \frac{\text{variance of each model}}{\text{variance of each model} + 3.29}$ , and the MOR was calculated as;  $MOR = \exp(0.95 \sqrt{\text{cluster level variance}})$ . Proportional Change in Variance (PCV) was computed for models I, II, and III with respect to the variance in the empty model as  $PCV = \frac{\text{variance of the empty model} - \text{variance of the model with more terms (model I, II, or III)}}{\text{variance of the empty model}}$ , to show the power of the factors in the model to explain malaria prevalence. All variables with a p-value  $\leq 0.2$  in the bi-variable analysis were fitted in the multivariable model. Adjusted OR (AOR) with 95% CI and  $p < 0.05$  were presented to reveal significantly associated factors.

**Ethics approval and consent to participate.** Permission to access the data was obtained from the measure DHS program (<http://www.dhsprogram.com>) via online request. The

**Table 2. Independent variables of malaria among children aged 6–59 months in SSA.**

| Variables                         | Categorization/operationalization                                                                                                                                                                            |
|-----------------------------------|--------------------------------------------------------------------------------------------------------------------------------------------------------------------------------------------------------------|
| <b>Individual level variables</b> |                                                                                                                                                                                                              |
| Age of child                      | The age of the child was categorized as 6–12, 13–23, 24–35, 36–47, and 48–59 months                                                                                                                          |
| Sex of child                      | The sex of the child was categorized as male or female.                                                                                                                                                      |
| Mothers educational level         | The mother's educational status was categorized as uneducated, primary, secondary, and above                                                                                                                 |
| Age of household head             | The age of household heads was categorized as 13–24, 25–34, 35–49, and $\geq 50$ years.                                                                                                                      |
| Wealth index                      | The wealth index was categorized as poorest, poorer, middle, richer, and richest.                                                                                                                            |
| Number of under-five children     | The number of under-five children was categorized as one, two, three & more                                                                                                                                  |
| Household has radio               | Household radio access was categorized as No and Yes                                                                                                                                                         |
| Household has television          | Household television access was categorized as No and Yes                                                                                                                                                    |
| Household has electricity         | Household electricity access was categorized as No and Yes                                                                                                                                                   |
| Source of drinking water          | The source of drinking water was categorized as Unimproved and Improved                                                                                                                                      |
| Type of toilet facility           | The type of toilet facility was categorized as Unimproved and Improved                                                                                                                                       |
| Main floor material               | The main floor material was categorized as Unimproved and Improved                                                                                                                                           |
| Main wall material                | The main Wall material was categorized as Unimproved and Improved                                                                                                                                            |
| Main roof material                | The main roof material was categorized as Unimproved and Improved                                                                                                                                            |
| Type of bed net                   | The type of bed net was categorized as Untreated and Treated                                                                                                                                                 |
| Number of mosquito net            | The number of mosquito nets was categorized as none, one, two, three & more                                                                                                                                  |
| Anemia level                      | The anemia level of children was categorized as severe, moderate, mild, and not anemic                                                                                                                       |
| <b>Community level variables</b>  |                                                                                                                                                                                                              |
| Residence                         | The type of place resident was grouped as urban and rural                                                                                                                                                    |
| Community ITN usage               | Community-level ITN usage was categorized as low and high. "Low" refers to communities in which < 50% of respondents use ITN while "high" indicates communities in which $\geq 50\%$ of respondents use ITN. |
| Community poverty                 | Community-level poverty was categorized as low if the proportion of low wealth quintile (poorest and poorer) households was < 50% and high if the proportion was $\geq 50\%$ .                               |
| Community media usage             | Community media usage was categorized as low if communities in which < 50% of respondents had media exposure and high if $\geq 50\%$ of respondents had media exposure.                                      |
| Community-women education         | Community women's education was categorized as low if communities in which < 50% of respondents had primary and above education and high if $\geq 50\%$ of respondents had attended primary and above.       |

<https://doi.org/10.1371/journal.pone.0285265.t002>

website and the data used were publicly available with no personal identifier. All methods were carried out in accordance with relevant guidelines and regulations.

## Results

### Background characteristics of study participants

A total of 60,541 under-five children from 13 SAA countries were included in this study. Of the total, 46.72% were in the age group of 36–59 months. About 38.13% and 44.80% of the mothers respectively did not attend formal education and were categorized in low-wealth quintiles (poorer and poorest). Regarding media access, 33,307 (55.03%) of the households listed radio and 17,941 (29.64%) watched television at least once a week. Nearly three-fourths (74.03%) of study participants were rural residents, and in total 33,972 (56.11%) uses treated mosquito nets. The majority of households had unimproved toilet facilities, floor, wall, and roof materials (Table 3).

**Table 3. Socio-demographic characteristics of study participants in Sub-Saharan Africa.**

| Variables                     | Categories          | Weighted frequency (%) |
|-------------------------------|---------------------|------------------------|
| Age of child (months)         | 6–12                | 7,475 (12.35)          |
|                               | 13–23               | 11,616 (19.19)         |
|                               | 24–35               | 13,169 (21.75)         |
|                               | 36–47               | 13,983 (23.10)         |
|                               | 48–59               | 14,298 (23.62)         |
| Sex of child                  | Male                | 30,775 (50.83)         |
|                               | Female              | 29,766 (49.17)         |
| Mothers educational level     | No education        | 23,084 (38.13)         |
|                               | Primary             | 13,492 (22.29)         |
|                               | Secondary and above | 23,965 (39.59)         |
| Age of household head         | 13–24               | 2,861 (4.72)           |
|                               | 25–34               | 14,531 (24.00)         |
|                               | 35–49               | 23,599 (38.98)         |
|                               | ≥50                 | 19,549 (32.29)         |
| Wealth index                  | Poorest             | 13,815 (22.82)         |
|                               | Poorer              | 13,307 (21.98)         |
|                               | Middle              | 12,107 (20.00)         |
|                               | Richer              | 11,520 (19.03)         |
|                               | Richest             | 9,792 (16.17)          |
| Number of under-five children | One                 | 18,269 (30.18)         |
|                               | Two                 | 21,742 (35.91)         |
|                               | Three & more        | 20,529 (33.91)         |
| Household has radio           | No                  | 27,221 (44.97)         |
|                               | Yes                 | 33,307 (55.03)         |
| Household has television      | No                  | 42,585 (70.36)         |
|                               | Yes                 | 17,941 (29.64)         |
| Household has electricity     | No                  | 43,599 (72.02)         |
|                               | Yes                 | 16,941 (27.98)         |
| Source of drinking water      | Unimproved          | 20,682 (34.16)         |
|                               | Improved            | 39,859 (65.84)         |
| Type of toilet facility       | Unimproved          | 33,732 (55.72)         |
|                               | Improved            | 26,809 (44.28)         |
| Main floor material           | Unimproved          | 33,731 (55.72)         |
|                               | Improved            | 26,810 (44.28)         |
| Main wall material            | Unimproved          | 32,479 (53.65)         |
|                               | Improved            | 28,062 (46.35)         |
| Main roof material            | Unimproved          | 35,179 (58.11)         |
|                               | Improved            | 25,362 (41.89)         |
| Type of bed net               | Untreated           | 26,569 (43.89)         |
|                               | Treated             | 33,972 (56.11)         |
| Number of mosquito net        | None                | 11,977 (19.78)         |
|                               | One                 | 11,098 (18.33)         |
|                               | Two                 | 14,268 (23.57)         |
|                               | Three & more        | 23,198 (38.32)         |
| Anemia level                  | Sever               | 1,826 (3.02)           |
|                               | Moderate            | 22,883 (37.81)         |
|                               | Mild                | 15,753 (26.03)         |
|                               | Not anemic          | 20,064 (33.15)         |

*(Continued)*



Table 3. (Continued)

| Variables                 | Categories | Weighted frequency (%) |
|---------------------------|------------|------------------------|
| Residence                 | Urban      | 15,722 (25.97)         |
|                           | Rural      | 44,819 (74.03)         |
| Community ITN usage       | Low        | 30,751 (50.79)         |
|                           | High       | 29,790 (49.21)         |
| Community poverty         | Low        | 30,933 (51.09)         |
|                           | High       | 29,608 (48.91)         |
| Community media usage     | Low        | 29,746 (49.13)         |
|                           | High       | 30,795 (50.87)         |
| Community-women education | Low        | 30,818 (50.90)         |
|                           | High       | 29,723 (49.10)         |

<https://doi.org/10.1371/journal.pone.0285265.t003>

### Prevalence of malaria

With inter-country variations, the overall pooled prevalence of malaria among children aged 6–59 months in SSA was found to be 27.41% (95% CI: 17.94%, 36.88%), ranging from 5.04% in Senegal to 62.57% in Sierra Leone (Fig 1).

### Multilevel logistic regression analysis

**Model comparison and random effect analysis.** The result of random effect analysis depicts that the ICC of the null model was 0.19, indicating that 19% of the total variability in malaria prevalence was attributable to between-cluster variability, while about 81% was due to individual differences. The null model MOR was 2.24, which indicates that a child from a cluster with high malaria prevalence has a 2.24 times higher probability of being infected than a child from a cluster with lower malaria prevalence. Model III was the best-fitted model since it

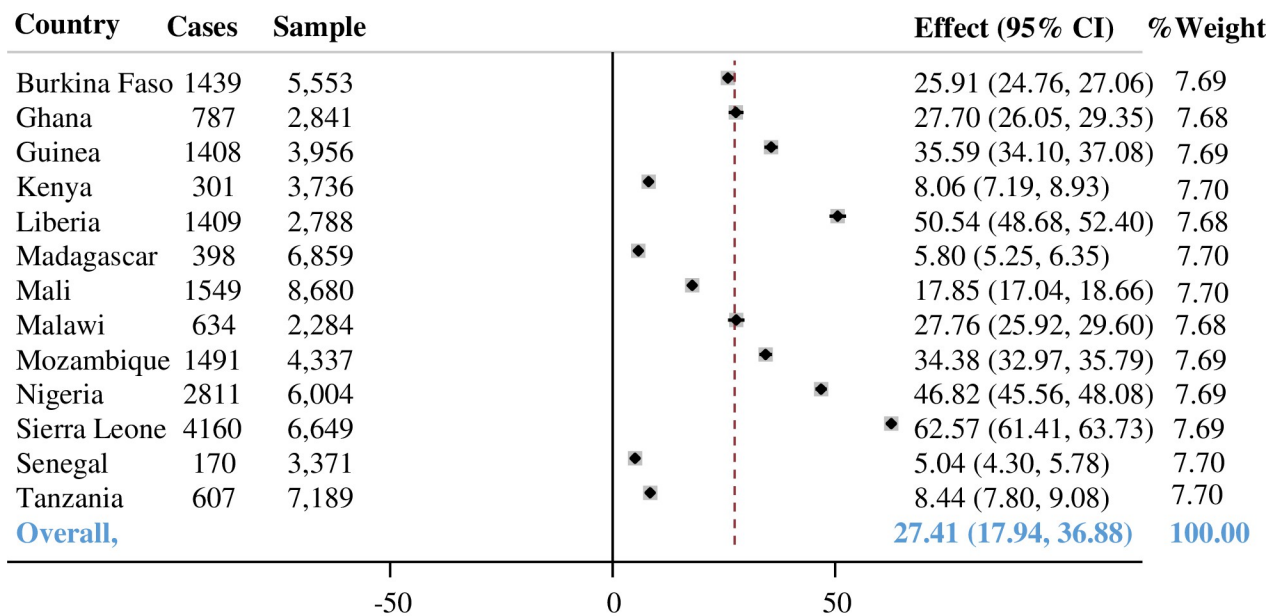

NOTE: Weights are from random-effects model

Fig 1. Pooled prevalence of malaria in under-five children in Sub-Saharan Africa.

<https://doi.org/10.1371/journal.pone.0285265.g001>

has the highest log likelihood (-17737) and the lowest deviance (35474) value. The PCV of model III was 72%, meaning that about 72% of the total variability in the malaria prevalence was explained by the full model (Table 4).

**Fixed effect analysis.** Based on the best model (Model III) multilevel logistics regression analysis, both individual and community-level variables were significant determinants of malaria in under-five children. Among individual-level variables; Children aged 13–23, 24–35, 36–47, and 48–59 months, maternal primary education, wealth index, the number of under-five children, the household has television, the household has electricity, main floor materials, main wall materials, main roof materials, anemia level, type of bed net and the number of mosquito nets were significantly associated variables with malaria. Additionally, community-level variables including place of residence, community ITN utilization, community poverty, and community women's education were significant factors for malaria (Table 4).

## Discussion

So far, the WHO-recommended malaria prevention strategies, such as vector control and chemoprophylaxis, have played a major role in reducing the burden in SSA countries [34,35]. However, complete elimination is jeopardized by different factors [36,37]. Pandemic, poverty, biological determinants (affected population, parasites, and vectors), climatic and environmental factors, weak health care systems, and political unrest are among the obstacles [38,39]. For example, in 2020, the malaria mortality rate increased for all ages due to service disruptions by the COVID-19 pandemic [40]. Additionally, a lack of political commitment and limited international and domestic funding for malaria elimination will slow the fight against the disease [41,42].

One of the WHO's strategic frameworks is to transform malaria surveillance into a core intervention. This includes identifying the most affected population, detecting possible determinants, providing a targeted response, and assessing the effectiveness of malaria protective tools [43]. Therefore, systematically investigating and identifying the potential factors of malaria among children aged 6–59 months will support the WHO's strategies for reducing malaria burden in many ways. Our study confirmed that the prevalence of malaria infection among children aged 6–59 months in the thirteen SSA countries was found at 27.41%. Senegal has the lowest (5.04%) prevalence while Sierra Leone bears the highest (62.57%). The variation among countries could be attributed to differences in socio-economic status, geographic situations, seasonal changes, health care system strength, national policy, and political commitments [44,45]. This study also revealed that both individual and community-level factors have a significant impact on malaria infection in those children.

The results showed a parallel correlation between malaria infection and child age. The odds of infection increase as the age of the child increases. Older under-five children were more likely to be infected as compared to younger ones [46–48]. Passively transferred maternal antibodies, such as lactoferrin and secretory IgA, provide protection to infants against malaria [49,50]. Besides, older children are more exposed to mosquitoes compared to younger ones, being more protected by their parents. The other possible reason why the infection rate is higher in older children is the fact that the insect prefers to bite older children, not infants [51]. Parents of older under-five children should be well informed by health workers via different communication tools, that their children are a group at high risk for malaria. Early information conveyed by health workers to parents enhancing knowledge and awareness about the risk of malaria for their children and efforts to prevent it.

Under-five children from whom the mother attended primary education were lower risk of becoming infected by malaria. Similar results were found on community-level, i.e. the risk of



**Table 4. Multivariable multilevel logistic regression analysis results of both individual-level and community-level factors associated with malaria in Sub-Saharan Africa.**

| Variables                     | Categories        | Null model | Model I<br>(AOR 95% CI) | Model II<br>(AOR 95% CI) | Model III<br>(AOR 95% CI) |
|-------------------------------|-------------------|------------|-------------------------|--------------------------|---------------------------|
| Age of child (months)         | 6–12              |            | 1.00                    | —                        | 1.00                      |
|                               | 13–23             |            | 1.62 (1.47–1.80)***     | —                        | 1.63 (1.47–1.81)***       |
|                               | 24–35             |            | 2.44 (2.21–2.70)***     | —                        | 2.44 (2.21–2.70)***       |
|                               | 36–47             |            | 3.54 (3.21–3.91)***     | —                        | 3.54 (3.21–3.91)***       |
|                               | 48–59             |            | 4.33 (3.92–4.78)***     | —                        | 4.32 (3.91–4.77)***       |
| Sex of child                  | Male              |            | 1.00                    | —                        | 1.00                      |
|                               | Female            |            | 0.99 (0.94–1.05)        | —                        | 0.99 (0.95–1.05)          |
| Mothers educational level     | No education      |            | 1.00                    | —                        | 1.00                      |
|                               | Primary education |            | 0.77 (0.72–0.83)**      | —                        | 0.78 (0.73–0.84)**        |
|                               | Secondary & above |            | 0.98 (0.95–1.08)        | —                        | 0.99 (0.97–1.11)          |
| Age of household head         | 13–24             |            | 1.00                    | —                        | 1.00                      |
|                               | 25–34             |            | 0.98 (0.86–1.13)        | —                        | 0.98 (0.86–1.13)          |
|                               | 35–49             |            | 1.03 (0.90–1.18)        | —                        | 1.03 (0.90–1.18)          |
|                               | ≥50               |            | 1.10 (0.95–1.26)        | —                        | 1.10 (0.95–1.26)          |
| Wealth index                  | Poorest           |            | 1.00                    | —                        | 1.00                      |
|                               | Poorer            |            | 0.81 (0.75–0.89)***     | —                        | 0.83 (0.77–0.90)***       |
|                               | Middle            |            | 0.57 (0.52–0.61)***     | —                        | 0.57 (0.52–0.62)***       |
|                               | Richer            |            | 0.33 (0.30–0.38)***     | —                        | 0.35 (0.32–0.39)***       |
|                               | Richest           |            | 0.15 (0.13–0.18)***     | —                        | 0.16 (0.14–0.19)***       |
| Number of under-five children | One               |            | 1.00                    | —                        | 1.00                      |
|                               | Two               |            | 1.19 (1.12–1.27)**      | —                        | 1.20 (1.12–1.28)***       |
|                               | Three & more      |            | 1.34 (1.25–1.45)***     | —                        | 1.35 (1.26–1.45)***       |
| Household has radio           | No                |            | 1.00                    | —                        | 1.00                      |
|                               | Yes               |            | 1.05 (0.99–1.11)        | —                        | 1.01 (0.98–1.09)          |
| Household has television      | No                |            | 1.00                    | —                        | 1.00                      |
|                               | Yes               |            | 0.85 (0.77–0.93)**      | —                        | 0.86 (0.78–0.95)**        |
| Household has electricity     | No                |            | 1.00                    | —                        | 1.00                      |
|                               | Yes               |            | 0.67 (0.61–0.73)***     | —                        | 0.68 (0.62–0.75)***       |
| Source of drinking water      | Unimproved        |            | 1.00                    | —                        | 1.00                      |
|                               | Improved          |            | 0.98 (0.93–1.04)        | —                        | 0.97 (0.92–1.04)          |
| Type of toilet facility       | Unimproved        |            | 1.00                    | —                        | 1.00                      |
|                               | Improved          |            | 0.98 (0.92–1.04)        | —                        | 1.00 (0.93–1.06)          |
| Main floor material           | Unimproved        |            | 1.00                    | —                        | 1.00                      |
|                               | Improved          |            | 0.64 (0.56–0.72)***     | —                        | 0.65 (0.57–0.73)***       |
| Main wall material            | Unimproved        |            | 1.00                    | —                        | 1.00                      |
|                               | Improved          |            | 0.68 (0.58–0.78)**      | —                        | 0.73 (0.64–0.84)***       |
| Main roof material            | Unimproved        |            | 1.00                    | —                        | 1.00                      |
|                               | Improved          |            | 0.78 (0.65–0.92)***     | —                        | 0.70 (0.51–0.93)***       |
| Number of mosquito net        | None              |            | 1.00                    | —                        | 1.00                      |
|                               | One               |            | 1.08 (0.99–1.18)        | —                        | 1.07 (0.98–1.17)          |
|                               | Two               |            | 0.90 (0.82–0.98)*       | —                        | 0.89 (0.82–0.98)**        |
|                               | Three & more      |            | 0.93 (0.85–1.01)        | —                        | 0.91 (0.83–0.99)**        |
| Type of bed net               | Untreated         |            | 1.00                    | —                        | 1.00                      |
|                               | Treated           |            | 0.55 (0.50–0.62)***     | —                        | 0.56 (0.51–0.62)***       |

(Continued)

Table 4. (Continued)

| Variables                        | Categories           | Null model | Model I<br>(AOR 95% CI) | Model II<br>(AOR 95% CI) | Model III<br>(AOR 95% CI) |
|----------------------------------|----------------------|------------|-------------------------|--------------------------|---------------------------|
| Anemia level                     | Sever                |            | 1.00                    | —                        | 1.00                      |
|                                  | Moderate             |            | 0.27 (0.23–0.32)***     | —                        | 0.27 (0.23–0.32)***       |
|                                  | Mild                 |            | 0.10 (0.09–0.13)***     | —                        | 0.11 (0.09–0.13)***       |
|                                  | Not anemic           |            | 0.06 (0.04–0.07)***     | —                        | 0.05 (0.04–0.06)***       |
| <b>Community-level variables</b> |                      |            |                         |                          |                           |
| Residence                        | Urban                |            | —                       | 1.00                     | 1.00                      |
|                                  | Rural                |            | —                       | 2.35 (2.19–2.52)***      | 2.16 (2.06–2.27)***       |
| Com. ITN usage                   | Low                  |            | —                       | 1.00                     | 1.00                      |
|                                  | High                 |            | —                       | 0.28 (0.14–0.39)*        | 0.40 (0.24–0.63)***       |
| Com. poverty                     | Low                  |            | —                       | 1.00                     | 1.00                      |
|                                  | High                 |            | —                       | 2.85 (2.66–3.07)**       | 2.66 (2.53–2.84)***       |
| Com. media usage                 | Low                  |            | —                       | 1.00                     | 1.00                      |
|                                  | High                 |            | —                       | 0.97 (0.83–1.15)         | 0.94 (0.81–1.11)          |
| Com. women's education           | Low                  |            | —                       | 1.00                     | 1.00                      |
|                                  | High                 |            | —                       | 0.85 (0.78–0.90)***      | 0.81 (0.73–0.88)***       |
| <b>Random effect</b>             |                      |            |                         |                          |                           |
|                                  | Variance             | 0.75       | 0.42                    | 0.29                     | 0.21                      |
|                                  | ICC                  | 0.19       | 0.11                    | 0.08                     | 0.06                      |
|                                  | MOR                  | 2.24       | 1.67                    | 1.39                     | 1.18                      |
|                                  | PCV                  | Reff       | 44.00                   | 61.33                    | 72.00                     |
| <b>Model comparison</b>          |                      |            |                         |                          |                           |
|                                  | Log likelihood ratio | -21258     | -18788                  | -20887                   | -17737                    |
|                                  | Deviance             | 42516      | 37576                   | 41774                    | 35474                     |

ICC = Inter cluster correlation coefficient, MOR = Median odds ratio, PCV = proportional change in variance. AOR = adjusted odds ratio; CI = confidence interval, Com. women's education = community women's education; Com. ITN usage = community Insecticide-treated bed nets; Com. Media = community media usage; Com. Poverty = community poverty status.

\* = P-value < 0.05

\*\* = P-value < 0.01

\*\*\* = P-value < 0.001.

<https://doi.org/10.1371/journal.pone.0285265.t004>

malaria infection was low among children originating from a community with high women's education [46,52]. Sub-Saharan Africa is a vast region where women's education is relatively low due to cultural, geographical, and socio-economic conditions [53]. Educated mothers usually have a better standard of living and better comprehension of malaria-related information that could help them to protect their children [54]. Mothers expand their knowledge about the impact of mosquito nets utilization, indoor residual spray, and other potential preventive measures for malaria [55,56]. In addition, it is crucial that the mother is aware of the signs and symptoms of malaria infection in order to get timely and appropriate treatment for their children [57].

Our study revealed an inverse relationship between the household wealth quintiles and malaria infection. As the household income increases, the odds of malaria infection decrease [58–60]. It was found that malaria infection was higher among children who are from a community with high poverty. The risk of being infected by malaria among children from the richest household was 84% less compared to the poorest. Malaria is often referred to as the epidemic of poverty [26]. In this study, almost a quarter of children are from the poorest

household. A plausible explanation is that malaria bankrupts households and national economies, lowers worker productivity, and discourages investment [61]. In essence, less Malaria leads to less poverty, leading to fewer expenses for households and improving their income. This also could lead to malnutrition among those children [21,62]. In our study, anemia status was a strong determinant of malaria infection. Poor nutritional status is associated with vulnerability to progression from malaria infection to disease [63].

Likewise, the number of under-five children in a household was found to be a significant determinant of malaria. The chance of infection increases as the number of children in the household increases. A previous study [64] revealed that one additional member in the household increases the likelihood of malaria infection by about 6.5%. Large family size mostly creates a congested space to sleep in the house and a shortage of mosquito nets [65]. The WHO recommends ITN utilization as a vital component of malaria control and elimination strategies as it is highly effective in preventing infection and reducing disease transmission [66]. Therefore, wide access to ITN for the household and the community is of crucial importance to limit the rate of malaria infection [67,68]. Our study confirmed that the infection is less likely in a household where an abundant number of mosquito nets is available. The risk is even much lower in children from a household with a mosquito net treated by insecticide and in a community with high ITN utilization.

Housing conditions including the possession of a television, electricity, and improved construction materials (floor, wall, and roof materials) have reduced the odds of malaria infection among children. Mass media (television, radio, newspaper) plays an important role to prevent malaria by disseminating information on the utilization of ITN and improving the housing condition [69]. The quality of the house or material used for construction affect the entry of mosquitoes into dwelling places [47,70]. Researchers revealed that modern and well-built housing played a vital role in controlling human exposure to mosquitoes [71,72]. Particularly in rural residents, the housing condition deteriorated which created a suitable environment for vector-borne diseases like malaria [73]. Our study confirmed that children residing in rural areas were 2.16 times more likely to be infected by the malaria parasite. Additionally, rural residents consistently face physical and financial problems to access health services for malaria treatment, resulting in high malaria infection prevalence.

Our study has some strengths and limitations. It used large nationally representative samples with appropriate statistical modeling. The use of large nationally representative data and multilevel analysis helps to provide more robust estimates of observed associations as well as enhance the generalizability of the results. Despite the strengths, this study used cross-sectional data, which did not indicated a temporal relationship between the factors and malaria infection. No important covariates, such as indoor residual spraying, vaccination, and other comorbid conditions, were incorporated in the study as the MIS did not provide a complete record of these variables.

## Conclusions and recommendations

Almost 3 out of 10 children were infected by malaria in the thirteen Sub-Saharan countries. Malaria infection remains one of the main killers of children aged 6–59 months in the SSA. This study revealed that older under-five children living in large families with low incomes in rural areas are most vulnerable to malaria infection. It also presented that ITN utilization and improved housing are promising means to effectively prevent malaria infection among children aged 6–59 months. It is therefore important to note that households with low wealth quintiles and rural residents should be prioritized in any mass distribution of ITNs. This has to be accompanied by education using mass media to enhance community awareness.

## Acknowledgments

The authors acknowledge the Measure DHS for providing us with the data set.

## Author Contributions

**Conceptualization:** Dagmawi Chilot.

**Data curation:** Dagmawi Chilot, Annelies Mondelaers, Adugnaw Zeleke Alem, Mezgebu Selamsew Asres, Mulugeta Ayalew Yimer, Alemayehu Teklu Toni, Tadesse Awoke Ayele.

**Formal analysis:** Dagmawi Chilot, Annelies Mondelaers, Adugnaw Zeleke Alem, Mezgebu Selamsew Asres, Mulugeta Ayalew Yimer, Alemayehu Teklu Toni, Tadesse Awoke Ayele.

**Investigation:** Dagmawi Chilot, Annelies Mondelaers, Adugnaw Zeleke Alem, Mezgebu Selamsew Asres, Mulugeta Ayalew Yimer.

**Methodology:** Dagmawi Chilot, Annelies Mondelaers, Adugnaw Zeleke Alem, Mezgebu Selamsew Asres, Mulugeta Ayalew Yimer, Alemayehu Teklu Toni, Tadesse Awoke Ayele.

**Project administration:** Dagmawi Chilot, Alemayehu Teklu Toni.

**Software:** Dagmawi Chilot, Annelies Mondelaers, Adugnaw Zeleke Alem, Mezgebu Selamsew Asres, Mulugeta Ayalew Yimer, Alemayehu Teklu Toni, Tadesse Awoke Ayele.

**Supervision:** Dagmawi Chilot.

**Validation:** Dagmawi Chilot, Annelies Mondelaers, Adugnaw Zeleke Alem, Mezgebu Selamsew Asres, Mulugeta Ayalew Yimer, Alemayehu Teklu Toni, Tadesse Awoke Ayele.

**Visualization:** Dagmawi Chilot, Annelies Mondelaers, Adugnaw Zeleke Alem, Mezgebu Selamsew Asres, Mulugeta Ayalew Yimer, Alemayehu Teklu Toni, Tadesse Awoke Ayele.

**Writing – original draft:** Dagmawi Chilot, Annelies Mondelaers, Adugnaw Zeleke Alem, Mezgebu Selamsew Asres, Mulugeta Ayalew Yimer, Alemayehu Teklu Toni, Tadesse Awoke Ayele.

**Writing – review & editing:** Dagmawi Chilot, Annelies Mondelaers, Adugnaw Zeleke Alem, Mezgebu Selamsew Asres, Mulugeta Ayalew Yimer, Alemayehu Teklu Toni, Tadesse Awoke Ayele.

## References

1. Mbacham W, Ayong L, Guewo-Fokeng M, Makoge V. Current situation of malaria in Africa. *Malaria Control and Elimination*: Springer; 2019. p. 29–44.
2. Nghochuzie NN, Olwal CO, Udoakang AJ, Amenga-Etego LN-K, Amambua-Ngwa A. Pausing the fight against malaria to combat the COVID-19 pandemic in Africa: is the future of malaria bleak? *Frontiers in microbiology*. 2020; 11:1476. <https://doi.org/10.3389/fmicb.2020.01476> PMID: 32625198
3. White NJ, Day NP, Ashley EA, Smithuis FM, Nosten FH. Have we really failed to roll back malaria? *The Lancet*. 2022; 399(10327):799–800. [https://doi.org/10.1016/S0140-6736\(22\)00175-1](https://doi.org/10.1016/S0140-6736(22)00175-1) PMID: 35219391
4. Organization. WH. World malaria report 2021: December 2021 available at: <https://www.who.int/teams/global-malaria-programme/reports/world-malaria-report-2021>: access date: 11/11/2022.
5. Monroe A, Williams NA, Ogoma S, Karema C, Okumu F. Reflections on the 2021 World Malaria Report and the future of malaria control. Springer; 2022.
6. Who. World malaria report 2020: 20 years of global progress and challenges. World Health Organization Geneva; 2020. p. 1–151.
7. Yang D, He Y, Wu B, Deng Y, Li M, Yang Q, et al. Drinking water and sanitation conditions are associated with the risk of malaria among children under five years old in sub-Saharan Africa: A logistic regression model analysis of national survey data. *Journal of advanced research*. 2020; 21:1–13.

8. Esu EB, Oringanje C, Meremikwu MM. Intermittent preventive treatment for malaria in infants. *Cochrane Database of Systematic Reviews*. 2021(7). <https://doi.org/10.1002/14651858.CD011525.pub3> PMID: 34273901
9. Kakuru A, Staedke SG, Dorsey G, Rogerson S, Chandramohan D. Impact of Plasmodium falciparum malaria and intermittent preventive treatment of malaria in pregnancy on the risk of malaria in infants: a systematic review. *Malaria journal*. 2019; 18(1):1–13.
10. Kwenti TE. Malaria and HIV coinfection in sub-Saharan Africa: prevalence, impact, and treatment strategies. *Research and reports in tropical medicine*. 2018; 9:123. <https://doi.org/10.2147/RRTM.S154501> PMID: 30100779
11. Fornace KM, Diaz AV, Lines J, Drakeley CJ. Achieving global malaria eradication in changing landscapes. *Malaria journal*. 2021; 20(1):1–14.
12. Nájera JA, González-Silva M, Alonso PL. Some lessons for the future from the Global Malaria Eradication Programme (1955–1969). *PLoS medicine*. 2011; 8(1):e1000412. <https://doi.org/10.1371/journal.pmed.1000412> PMID: 21311585
13. Kohler JC, Bowra A. Exploring anti-corruption, transparency, and accountability in the World Health Organization, the United Nations Development Programme, the World Bank Group, and the Global Fund to Fight AIDS, Tuberculosis and Malaria. *Globalization and Health*. 2020; 16(1):1–10.
14. Okeke AI, Ofuebe JI, Anike IA. Prevention Practices, Accessibility and Availability of Roll Back Malaria Programme among Pregnant Women in Nsukka Local Government Area, Enugu State. *International Journal of Human Kinetics, Health and Education*. 2021; 6(1).
15. Marten R. How states exerted power to create the millennium development goals and how this shaped the global health agenda: lessons for the sustainable development goals and the future of global health. *Global Public Health*. 2019; 14(4):584–99. <https://doi.org/10.1080/17441692.2018.1468474> PMID: 29697307
16. Degarege A, Fennie K, Degarege D, Chennupati S, Madhivanan P. Improving socioeconomic status may reduce the burden of malaria in sub Saharan Africa: A systematic review and meta-analysis. *PloS one*. 2019; 14(1):e0211205. <https://doi.org/10.1371/journal.pone.0211205> PMID: 30677102
17. Tangena J-AA, Hendriks CM, Devine M, Tammaro M, Trett AE, Williams I, et al. Indoor residual spraying for malaria control in sub-Saharan Africa 1997 to 2017: an adjusted retrospective analysis. *Malaria journal*. 2020; 19(1):1–15.
18. UNICEF. Malaria in Africa: July 2022 available at:<https://data.unicef.org/topic/child-health/malaria/>; access date: 11/11/2022
19. Ibeji JU, Mwambi H, Iddrisu A-K. Spatial variation and risk factors of malaria and anaemia among children aged 0 to 59 months: a cross-sectional study of 2010 and 2015 datasets. *Scientific reports*. 2022; 12(1):1–15.
20. Tesema GA, Worku MG, Tessema ZT, Teshale AB, Alem AZ, Yeshaw Y, et al. Prevalence and determinants of severity levels of anemia among children aged 6–59 months in sub-Saharan Africa: A multilevel ordinal logistic regression analysis. *PloS one*. 2021; 16(4):e0249978. <https://doi.org/10.1371/journal.pone.0249978> PMID: 33891603
21. Papaioannou I, Utzinger J, Vounatsou P. Malaria-anemia comorbidity prevalence as a measure of malaria-related deaths in sub-Saharan Africa. *Scientific reports*. 2019; 9(1):1–9.
22. Yankson R, Anto EA, Chipeta MG. Geostatistical analysis and mapping of malaria risk in children under 5 using point-referenced prevalence data in Ghana. *Malaria Journal*. 2019; 18(1):1–12.
23. Brault MA, Mwinga K, Kipp AM, Kennedy SB, Maimbolwa M, Moyo P, et al. Measuring child survival for the Millennium Development Goals in Africa: what have we learned and what more is needed to evaluate the Sustainable Development Goals? *Global health action*. 2020; 13(1):1732668. <https://doi.org/10.1080/16549716.2020.1732668> PMID: 32114967
24. Durokifa AA, Ijeoma EC. Neo-colonialism and Millennium Development Goals (MDGs) in Africa: A blend of an old wine in a new bottle. *African Journal of Science, Technology, Innovation and Development*. 2018; 10(3):355–66.
25. Willis DW, Hamon N. Impact of eliminating malaria by 2040 on poverty rates among agricultural households in Africa. *Gates Open Research*. 2018; 2:69.
26. Abdullahi AA, Abubakar AD. Why it is difficult to eradicate malaria in Sub-Sahara Africa. *Perspectives on Global Development and Technology*. 2019; 18(3):269–85.
27. Ebhuoma O, Gebreslasie M, Ogunsakin RE. Socio-economic status as predictors of malaria transmission in KwaZulu-Natal, South Africa. A retrospective study. *African Health Sciences*. 2022; 22(2):204–15. <https://doi.org/10.4314/ahs.v22i2.24> PMID: 36407392
28. Willis DW, Hamon N. Evidence for the impact of malaria on agricultural household income in sub-Saharan Africa. *Gates Open Research*. 2019; 3:9.

29. Woday A, Mohammed A, Gebre A, Urmale K. Prevalence and associated factors of malaria among febrile children in Afar region, Ethiopia: a health facility based study. *Ethiopian journal of health sciences*. 2019;29(5).
30. Hajison PL, Feresu SA, Mwakikunga BW. Malaria in children under-five: a comparison of risk factors in lakeshore and highland areas, Zomba district, Malawi. *PLoS One*. 2018; 13(11):e0207207. <https://doi.org/10.1371/journal.pone.0207207> PMID: 30419002
31. Ajakaye OG, Ibukunoluwa MR. Prevalence and risk of malaria, anemia and malnutrition among children in IDPs camp in Edo State, Nigeria. *Parasite epidemiology and control*. 2020; 8:e00127. <https://doi.org/10.1016/j.parepi.2019.e00127> PMID: 31872094
32. Chilanga E, Collin-Vézina D, MacIntosh H, Mitchell C, Cherney K. Prevalence and determinants of malaria infection among children of local farmers in Central Malawi. *Malaria Journal*. 2020; 19(1):1–10.
33. Mutombo AM, Mukuku O, Tshibanda KN, Swana EK, Mukomena E, Ngwej DT, et al. Severe malaria and death risk factors among children under 5 years at Jason Sendwe Hospital in Democratic Republic of Congo. *Pan African Medical Journal*. 2018; 29(1):1–8. <https://doi.org/10.11604/pamj.2018.29.184.15235> PMID: 30061962
34. McCann RS, Kabaghe AN, Moraga P, Gowelo S, Mburu MM, Tizifa T, et al. The effect of community-driven larval source management and house improvement on malaria transmission when added to the standard malaria control strategies in Malawi: a cluster-randomized controlled trial. *Malaria journal*. 2021; 20(1):1–16.
35. Paton DG, Probst AS, Ma E, Adams KL, Shaw WR, Singh N, et al. Using an antimalarial in mosquitoes overcomes Anopheles and Plasmodium resistance to malaria control strategies. *PLoS Pathogens*. 2022; 18(6):e1010609.
36. Shahandeh K, Basseri HR. Challenges and the path forward on malaria elimination intervention: a systematic review. *Iranian Journal of Public Health*. 2019; 48(6):1004. PMID: 31341841
37. Maharaj R, Kissoon S, Lakan V, Kheswa N. Rolling back malaria in Africa—challenges and opportunities to winning the elimination battle. *South African Medical Journal*. 2019; 109(11b):53–6. <https://doi.org/10.7196/SAMJ.2019.v109i11b.14250> PMID: 32252869
38. Ren M. Greater political commitment needed to eliminate malaria. *Infectious diseases of poverty*. 2019; 8(02):1–4. <https://doi.org/10.1186/s40249-019-0542-8> PMID: 31030666
39. Omondi CJ, Onguru D, Kamau L, Nanyingi M, Ong'amo G, Estambale B. Perennial transmission of malaria in the low altitude areas of Baringo County, Kenya. *Malaria Journal*. 2017; 16(1):1–8.
40. Hussein MIH, Albashir AAD, Elawad OAMA, Homeida A. Malaria and COVID-19: unmasking their ties. *Malaria journal*. 2020; 19(1):1–10.
41. Lindsay SW, Thomas MB, Kleinschmidt I. Threats to the effectiveness of insecticide-treated bednets for malaria control: thinking beyond insecticide resistance. *The Lancet Global Health*. 2021; 9(9):e1325–e31. [https://doi.org/10.1016/S2214-109X\(21\)00216-3](https://doi.org/10.1016/S2214-109X(21)00216-3) PMID: 34216565
42. Russell TL, Farlow R, Min M, Espino E, Mnzava A, Burkot TR. Capacity of National Malaria Control Programmes to implement vector surveillance: a global analysis. *Malaria Journal*. 2020; 19(1):1–9.
43. Organization WH. Malaria Programme Managers Meeting to Review Progress on Implementation of the Regional Action Framework for Malaria Control and Elimination in the Western Pacific 2016–2020, Manila, Philippines, 25–27 June 2018: meeting report. 2018.
44. Dimala CA, Kika BT, Kadia BM, Blencowe H. Current challenges and proposed solutions to the effective implementation of the RTS, S/AS01 Malaria Vaccine Program in sub-Saharan Africa: A systematic review. *PLoS one*. 2018; 13(12):e0209744. <https://doi.org/10.1371/journal.pone.0209744> PMID: 30596732
45. Guerra CA, Donfack OT, Vaz LM, Nlang JAM, Nchama LON, Eyono JNM, et al. Malaria vector control in sub-Saharan Africa in the time of COVID-19: no room for complacency. *BMJ global health*. 2020; 5(9):e003880. <https://doi.org/10.1136/bmjgh-2020-003880> PMID: 32938611
46. Gaston RT, Ramroop S. Prevalence of and factors associated with malaria in children under five years of age in Malawi, using malaria indicator survey data. *Heliyon*. 2020; 6(5):e03946. <https://doi.org/10.1016/j.heliyon.2020.e03946> PMID: 32426545
47. Morakinyo OM, Balogun FM, Fagbamigbe AF. Housing type and risk of malaria among under-five children in Nigeria: evidence from the malaria indicator survey. *Malaria journal*. 2018; 17(1):1–11.
48. Nawa M, Hangoma P, Morse AP, Michelo C. Investigating the upsurge of malaria prevalence in Zambia between 2010 and 2015: a decomposition of determinants. *Malaria journal*. 2019; 18(1):1–10.
49. Ferluga J, Singh I, Rout S, Al-Qahtani A, Yasmin H, Kishore U. Immune responses in malaria and vaccine strategies. *Microbial Pathogenesis*: Springer; 2021. p. 273–91. [https://doi.org/10.1007/978-3-030-67452-6\\_12](https://doi.org/10.1007/978-3-030-67452-6_12) PMID: 34661899



50. Ndiabamoh CoM-c Ekali GL, Esemu L Lloyd YM, Djontu JC, Mbacham W, et al. The immunoglobulin G antibody response to malaria merozoite antigens in asymptomatic children co-infected with malaria and intestinal parasites. *PloS one*. 2020; 15(11):e0242012. <https://doi.org/10.1371/journal.pone.0242012> PMID: 33170876
51. Kassim OO, Ako-Anai KA, Torimiro SE, Hollowell GP, Okoye VC, Martin S. Inhibitory factors in breast-milk, maternal and infant sera against in vitro growth of *Plasmodium falciparum* malaria parasite. *Journal of Tropical Pediatrics*. 2000; 46(2):92–6. <https://doi.org/10.1093/tropej/46.2.92> PMID: 10822935
52. Emina JB, Doctor HV, Yé Y. Profiling malaria infection among under-five children in the Democratic Republic of Congo. *PloS one*. 2021; 16(5):e0250550. <https://doi.org/10.1371/journal.pone.0250550> PMID: 33956848
53. Asongu SA, Nnanna J, Acha-Anyi PN. Finance, inequality and inclusive education in Sub-Saharan Africa. *Economic Analysis and Policy*. 2020; 67:162–77.
54. Psaki SR, Mensch BS, Chuang E, Melnikas AJ. Evidence for Causal Links Between Education and Maternal and Child Health, Sexual and Reproductive Health, and Malaria: A Systematic Review. *Population Association of America Denver, Colorado: Population Council*. 2018.
55. Imboumy-Limoukou RK, Maghendji-Nzondo S, Ondo-Enguier PN, Niemczura De Carvalho J, Tsafack-Tegomo NP, Buekens J, et al. Malaria in children and women of childbearing age: infection prevalence, knowledge and use of malaria prevention tools in the province of Nyanga, Gabon. *Malaria journal*. 2020; 19(1):1–8.
56. Oladimeji KE, Tsoka-Gwegweni JM, Ojewole E, Yunga ST. Knowledge of malaria prevention among pregnant women and non-pregnant mothers of children aged under 5 years in Ibadan, South West Nigeria. *Malaria journal*. 2019; 18(1):1–12.
57. Babalola OJ, Ajumobi O, Ajayi IO. Rural–urban disparities and factors associated with delayed care-seeking and testing for malaria before medication use by mothers of under-five children, Igabi LGA, Kaduna Nigeria. *Malaria Journal*. 2020; 19(1):1–11.
58. Obasohan PE, Walters SJ, Jacques R, Khatab K. A scoping review of selected studies on predictor variables associated with the malaria status among children under five years in Sub-Saharan Africa. *International Journal of Environmental Research and Public Health*. 2021; 18(4):2119. <https://doi.org/10.3390/ijerph18042119> PMID: 33671594
59. Paul E, Msengwa AS. Prevalence and socio-demographic factors associated with malaria infection among children under five years in Tanzania. *Journal of Public Health and Epidemiology*. 2018; 10(11):387–94.
60. Oguoma VM, Anyasodor AE, Adeleye AO, Eneanya OA, Mbanefo EC. Multilevel modelling of the risk of malaria among children aged under five years in Nigeria. *Transactions of The Royal Society of Tropical Medicine and Hygiene*. 2021; 115(5):482–94. <https://doi.org/10.1093/trstmh/traa092> PMID: 32945885
61. Parkhurst J, Ghilardi L, Webster J, Snow RW, Lynch CA. Competing interests, clashing ideas and institutionalizing influence: insights into the political economy of malaria control from seven African countries. *Health policy and planning*. 2021; 36(1):35–44. <https://doi.org/10.1093/heapol/czaa166> PMID: 33319225
62. Asoba GN, Sumbele IUN, Anchang-Kimbi JK, Metuge S, Teh RN. Influence of infant feeding practices on the occurrence of malnutrition, malaria and anaemia in children ≤ 5 years in the Mount Cameroon area: A cross sectional study. *PloS one*. 2019; 14(7):e0219386.
63. Ippolito MM, Kamavu LK, Kabuya J-B, Tente C, Chileshe E, Wapachole M, et al. Risk factors for mortality in children hospitalized with severe malaria in northern Zambia: a retrospective case-control study. *The American Journal of Tropical Medicine and Hygiene*. 2018; 98(6):1699. <https://doi.org/10.4269/ajtmh.17-1017> PMID: 29692306
64. Afoakwah C, Deng X, Onur I. Malaria infection among children under-five: the use of large-scale interventions in Ghana. *BMC public health*. 2018; 18(1):1–13. <https://doi.org/10.1186/s12889-018-5428-3> PMID: 29685120
65. Sharma RK, Rajvanshi H, Bharti PK, Nisar S, Jayswar H, Mishra AK, et al. Socio-economic determinants of malaria in tribal dominated Mandla district enrolled in Malaria Elimination Demonstration Project in Madhya Pradesh. *Malaria Journal*. 2021; 20(1):1–13.
66. Pryce J, Richardson M, Lengeler C. Insecticide-treated nets for preventing malaria. *Cochrane Database of Systematic Reviews*. 2018(11). <https://doi.org/10.1002/14651858.CD000363.pub3> PMID: 30398672
67. Levitz L, Janko M, Mwandagaliwa K, Thwai KL, Likwela JL, Tshetu AK, et al. Effect of individual and community-level bed net usage on malaria prevalence among under-fives in the Democratic Republic of Congo. *Malaria journal*. 2018; 17(1):1–8.
68. Girum T, Shumbej T, Shewangizaw M. Burden of malaria in Ethiopia, 2000–2016: findings from the Global Health Estimates 2016. *Tropical Diseases, Travel Medicine and Vaccines*. 2019; 5(1):1–7. <https://doi.org/10.1186/s40794-019-0090-z> PMID: 31338202

69. Yaya S, Uthman OA, Amouzou A, Bishwajit G. Mass media exposure and its impact on malaria prevention behaviour among adult women in sub-Saharan Africa: results from malaria indicator surveys. *Global health research and policy*. 2018; 3(1):1–9. <https://doi.org/10.1186/s41256-018-0075-x> PMID: [29998191](https://pubmed.ncbi.nlm.nih.gov/29998191/)
70. Nguela RL, Bigoga JD, Armel TN, Esther T, Line D, Boris NA, et al. The effect of improved housing on indoor mosquito density and exposure to malaria in the rural community of Minkoameyos, Centre Region of Cameroon. *Malaria journal*. 2020; 19(1):1–16.
71. Pinder M, Conteh L, Jeffries D, Jones C, Knudsen J, Kandeh B, et al. The RooPfs study to assess whether improved housing provides additional protection against clinical malaria over current best practice in The Gambia: study protocol for a randomized controlled study and ancillary studies. *Trials*. 2016; 17(1):1–11. <https://doi.org/10.1186/s13063-016-1400-7> PMID: [27255167](https://pubmed.ncbi.nlm.nih.gov/27255167/)
72. Furnival-Adams J, Olanga EA, Napier M, Garner P. Housing interventions for preventing malaria. *The Cochrane Database of Systematic Reviews*. 2019; 2019(8).
73. Rek JC, Alegana V, Arinaitwe E, Cameron E, Kamya MR, Katureebe A, et al. Rapid improvements to rural Ugandan housing and their association with malaria from intense to reduced transmission: a cohort study. *The lancet Planetary health*. 2018; 2(2):e83–e94. [https://doi.org/10.1016/S2542-5196\(18\)30010-X](https://doi.org/10.1016/S2542-5196(18)30010-X) PMID: [29615240](https://pubmed.ncbi.nlm.nih.gov/29615240/)
